# Supplementary material for: IQ-TREE: A Fast and Effective Stochastic Algorithm for Estimating Maximum-Likelihood Phylogenies
Source: PubMed Central journal article supplement — Mol Biol Evol. 2014 Nov 3;32(1):268–74. doi: 10.1093/molbev/msu300 (PMC4271533; doi:10.1093/molbev/msu300), 2014-11-03
Supplement: supp_msu300_SupplementaryTables.pdf [file supp_msu300_SupplementaryTables.pdf]

# Supplementary tables

Table S1 TreeBASE DNA alignments and average log-likelihoods. In bold face are the highest log-likelihood found for each alignment.

| TreeBASE ID | #Taxa | #Sites | % Gaps / ambiguous characters | IQ-TREE with default stopping rule | RAxML             | IQ-TREE restricted to RAxML time | PhyML             | IQ-TREE restricted to PhyML time |
|-------------|-------|--------|-------------------------------|------------------------------------|-------------------|----------------------------------|-------------------|----------------------------------|
| M214        | 295   | 1836   | 13.32                         | <b>-38,670.97</b>                  | -38,681.75        | -38,678.08                       | -38,687.82        | -38,679.68                       |
| M667        | 218   | 1002   | 4.67                          | <b>-45,048.88</b>                  | -45,052.75        | -45,049.03                       | -45,060.45        | <b>-45,048.88</b>                |
| M980        | 249   | 1604   | 19.23                         | <b>-19,611.37</b>                  | -19,619.88        | -19,614.52                       | -19,629.07        | -19,613.97                       |
| M1110       | 330   | 1711   | 10.14                         | <b>-56,377.21</b>                  | -56,382.67        | -56,377.39                       | -56,379.22        | <b>-56,377.21</b>                |
| M1224       | 210   | 8235   | 40.95                         | <b>-241,142.99</b>                 | -241,162.43       | -241,143.12                      | -241,163.34       | -241,144.92                      |
| M1838       | 228   | 1131   | 2.1                           | <b>-76,967.34</b>                  | -77,073.62        | -76,971.09                       | -77,041.43        | -76,972.60                       |
| M2307       | 318   | 1434   | 3.87                          | <b>-35,722.34</b>                  | -35,737.57        | -35,726.57                       | -35,745.25        | -35,724.83                       |
| M2534       | 207   | 976    | 10.23                         | -23,626.38                         | <b>-23,617.43</b> | -23,627.83                       | -23,665.68        | -23,634.39                       |
| M2902       | 220   | 1117   | 1.14                          | -7,206.09                          | -7,212.21         | -7,210.28                        | <b>-7,204.67</b>  | -7,207.63                        |
| M2931       | 229   | 4722   | 23.7                          | <b>-54,290.51</b>                  | -54,310.48        | -54,291.02                       | -54,294.23        | -54,290.86                       |
| M3031       | 276   | 1518   | 14.47                         | <b>-20,237.53</b>                  | -20,249.97        | -20,243.53                       | -20,266.95        | -20,245.69                       |
| M3198       | 216   | 2578   | 11.09                         | <b>-147,473.15</b>                 | -147,498.71       | -147,478.56                      | -147,483.62       | -147,475.27                      |
| M3514       | 217   | 3665   | 41.73                         | <b>-141,010.38</b>                 | -141,030.79       | -141,037.88                      | -141,063.13       | -141,044.94                      |
| M3605       | 260   | 5315   | 34.05                         | <b>-55,863.43</b>                  | -55,870.86        | -55,865.33                       | -55,876.41        | -55,864.25                       |
| M3777       | 363   | 1707   | 3.44                          | -19,365.75                         | -19,378.47        | -19,365.80                       | <b>-19,364.62</b> | -19,365.76                       |
| M4170       | 258   | 2559   | 5.51                          | <b>-16,585.71</b>                  | -16,602.40        | -16,594.25                       | -16,592.69        | -16,590.74                       |
| M4324       | 206   | 4543   | 25.32                         | <b>-117,989.19</b>                 | -118,026.61       | -118,003.45                      | -118,098.31       | -117,992.93                      |
| M4326       | 227   | 4055   | 9.73                          | <b>-29,395.83</b>                  | -29,411.69        | -29,396.27                       | -29,400.38        | -29,395.86                       |
| M4399       | 205   | 8913   | 57.25                         | <b>-59,907.83</b>                  | -59,915.50        | -59,915.65                       | -59,918.08        | -59,912.89                       |
| M4720       | 201   | 2899   | 30.81                         | <b>-53,732.74</b>                  | -53,744.97        | <b>-53,732.74</b>                | -53,734.79        | <b>-53,732.74</b>                |
| M4727       | 350   | 6464   | 52.26                         | <b>-206,129.75</b>                 | -206,208.32       | -206,132.97                      | -206,150.81       | -206,130.16                      |

| TreeBASE ID | #Taxa | #Sites | % Gaps /<br>ambiguous<br>characters | IQ-TREE with default<br>stopping rule | RAxML         | IQ-TREE<br>restricted to<br>RAxML time | PhyML             | IQ-TREE restricted<br>to PhyML time |
|-------------|-------|--------|-------------------------------------|---------------------------------------|---------------|----------------------------------------|-------------------|-------------------------------------|
| M4794       | 204   | 12113  | 52.47                               | <b>-148,388.80</b>                    | -148,434.07   | -148,453.76                            | -148,669.35       | -148,413.50                         |
| M4806       | 222   | 3995   | 26.7                                | <b>-73,850.56</b>                     | -73,865.86    | <b>-73,850.56</b>                      | -73,851.22        | <b>-73,850.56</b>                   |
| M4850       | 328   | 2166   | 6.15                                | -23,425.32                            | -23,427.86    | -23,425.57                             | -23,426.00        | <b>-23,425.01</b>                   |
| M4900       | 206   | 3074   | 31.27                               | -62,389.10                            | -62,403.73    | -62,389.11                             | <b>-62,388.47</b> | -62,389.10                          |
| M4927       | 268   | 1275   | 37.89                               | <b>-15,275.77</b>                     | -15,302.56    | -15,289.19                             | -15,314.22        | -15,288.21                          |
| M4938       | 213   | 1250   | 8.13                                | <b>-36,243.38</b>                     | -36,261.75    | -36,245.11                             | -36,258.73        | -36,244.48                          |
| M5078       | 265   | 9768   | 14.48                               | <b>-317,361.67</b>                    | -317,382.43   | -317,361.69                            | -317,370.73       | -317,362.15                         |
| M5235       | 298   | 11596  | 67.51                               | <b>-66,573.65</b>                     | -66,588.26    | -66,580.11                             | -66,592.51        | -66,577.79                          |
| M5381       | 413   | 3632   | 10.42                               | <b>-224,667.49</b>                    | -224,712.33   | -224,685.74                            | -224,733.80       | -224,668.63                         |
| M5731       | 242   | 9626   | 62.94                               | <b>-79,593.92</b>                     | -79,608.95    | -79,594.80                             | -79,596.64        | -79,594.50                          |
| M5931       | 298   | 4948   | 47.67                               | <b>-71,241.57</b>                     | -71,261.17    | -71,251.78                             | -71,281.02        | -71,250.53                          |
| M6134       | 219   | 5158   | 28.53                               | <b>-30,201.02</b>                     | -30,265.32    | -30,228.78                             | -30,266.62        | -30,222.20                          |
| M6414       | 209   | 2000   | 29.9                                | <b>-36,707.55</b>                     | -36,717.07    | -36,709.87                             | -36,713.05        | -36,709.22                          |
| M6625       | 247   | 1812   | 32.17                               | <b>-17,190.07</b>                     | -17,203.34    | -17,193.05                             | -17,205.32        | -17,193.46                          |
| M7024       | 767   | 5814   | 66.73                               | <b>-381,126.07</b>                    | -381,168.90   | -381,161.16                            | -381,269.87       | -381,135.11                         |
| M7054       | 222   | 6237   | 35.63                               | <b>-79,139.05</b>                     | -79,143.97    | -79,143.80                             | -79,155.57        | -79,141.71                          |
| M7165       | 357   | 4475   | 17.65                               | <b>-76,166.48</b>                     | -76,177.78    | -76,168.62                             | -76,168.94        | -76,167.32                          |
| M7210       | 204   | 1701   | 64.48                               | <b>-14,803.61</b>                     | -14,810.03    | -14,804.95                             | -14,804.61        | -14,804.49                          |
| M7211       | 201   | 1519   | 50.61                               | <b>-16,465.75</b>                     | -16,470.14    | -16,465.85                             | -16,466.11        | -16,466.29                          |
| M7292       | 213   | 7572   | 44.14                               | <b>-192,598.51</b>                    | -192,629.55   | -192,601.89                            | -192,673.02       | -192,604.30                         |
| M7929       | 428   | 15016  | 57.7                                | <b>-410,939.26</b>                    | -410,983.84   | -410,949.34                            | -411,028.18       | -410,945.26                         |
| M7964       | 640   | 25260  | 41.43                               | -1,327,204.51                         | -1,327,314.04 | -1,327,210.58                          | -1,327,375.92     | <b>-1,327,202.44</b>                |
| M8012       | 213   | 2333   | 5.76                                | <b>-67,060.36</b>                     | -67,070.90    | -67,060.78                             | -67,072.40        | <b>-67,060.36</b>                   |
| M8385       | 212   | 19972  | 63.57                               | <b>-347,340.89</b>                    | -347,360.26   | -347,376.10                            | -347,515.64       | -347,353.57                         |
| M8619       | 246   | 11829  | 65.9                                | <b>-93,597.01</b>                     | -93,606.25    | <b>-93,597.01</b>                      | -93,600.99        | -93,597.29                          |
| M8692       | 395   | 3583   | 14.73                               | <b>-24,993.81</b>                     | -25,033.99    | -25,014.37                             | -25,014.32        | -25,009.85                          |
| M8703       | 215   | 1038   | 0.31                                | <b>-17,399.39</b>                     | -17,416.29    | -17,399.58                             | -17,403.57        | -17,399.41                          |

| TreeBASE ID | #Taxa | #Sites | % Gaps /<br>ambiguous<br>characters | IQ-TREE with default<br>stopping rule | RAxML              | IQ-TREE<br>restricted to<br>RAxML time | PhyML             | IQ-TREE restricted<br>to PhyML time |
|-------------|-------|--------|-------------------------------------|---------------------------------------|--------------------|----------------------------------------|-------------------|-------------------------------------|
| M8975       | 405   | 3027   | 1.78                                | <b>-92,430.53</b>                     | -92,454.00         | -92,431.41                             | -92,525.99        | -92,431.59                          |
| M8982       | 297   | 6954   | 42.72                               | <b>-141,323.67</b>                    | -141,349.66        | <b>-141,323.67</b>                     | -141,328.39       | <b>-141,323.67</b>                  |
| M8984       | 201   | 3931   | 29.43                               | <b>-21,997.97</b>                     | -22,004.58         | -21,999.10                             | -22,005.05        | -21,999.24                          |
| M9033       | 300   | 1394   | 7.1                                 | <b>-23,867.40</b>                     | -23,871.18         | -23,869.91                             | -23,869.90        | -23,870.76                          |
| M9142       | 235   | 1854   | 9.07                                | <b>-18,985.30</b>                     | -18,985.57         | -18,989.29                             | -18,987.18        | -18,992.48                          |
| M9143       | 228   | 1223   | 11.52                               | -8,917.67                             | -8,917.71          | -8,923.28                              | <b>-8,911.35</b>  | -8,917.71                           |
| M9915       | 504   | 2757   | 54.26                               | -483,690.03                           | <b>-483,684.95</b> | -483,720.07                            | -483,795.81       | -483,738.35                         |
| M10243      | 203   | 1771   | 0.4                                 | -16,344.85                            | -16,348.02         | -16,344.91                             | <b>-16,344.57</b> | -16,344.86                          |
| M10434      | 544   | 5681   | 7.2                                 | <b>-139,349.11</b>                    | -139,362.30        | -139,352.27                            | -139,363.43       | -139,352.25                         |
| M10467      | 202   | 4074   | 45.87                               | <b>-91,948.98</b>                     | -91,962.16         | -91,949.77                             | -91,952.53        | -91,949.00                          |
| M10933      | 229   | 2696   | 22.58                               | <b>-94,316.14</b>                     | -94,342.72         | -94,323.67                             | -94,362.75        | -94,320.81                          |
| M11113      | 344   | 9778   | 15.7                                | <b>-487,985.38</b>                    | -488,032.50        | -487,987.70                            | -488,019.47       | -487,992.29                         |
| M11745      | 316   | 1494   | 49.58                               | <b>-19,004.08</b>                     | -19,014.98         | -19,005.73                             | -19,015.87        | -19,004.84                          |
| M11762      | 208   | 2468   | 0.06                                | -20,050.65                            | -20,061.46         | -20,050.65                             | <b>-20,048.61</b> | -20,050.65                          |
| M12051      | 699   | 6914   | 40.96                               | -384,988.31                           | -385,007.09        | -385,032.28                            | -385,081.21       | <b>-384,987.48</b>                  |
| M12098      | 231   | 4108   | 38.01                               | <b>-129,824.04</b>                    | -129,830.33        | -129,824.09                            | -129,841.30       | -129,824.07                         |
| M12388      | 324   | 1405   | 42.11                               | <b>-9,609.98</b>                      | -9,620.77          | -9,610.81                              | -9,612.25         | -9,610.15                           |
| M13718      | 235   | 2309   | 37.25                               | -100,203.82                           | -100,215.25        | -100,206.13                            | -100,224.21       | <b>-100,202.73</b>                  |
| M14164      | 204   | 5549   | 59.37                               | <b>-40,356.16</b>                     | -40,367.22         | -40,358.50                             | -40,371.17        | -40,357.91                          |
| M14165      | 204   | 5611   | 41.84                               | <b>-144,455.80</b>                    | -144,476.21        | -144,458.86                            | -144,467.93       | -144,456.17                         |
| M14582      | 372   | 61199  | 68.64                               | <b>-656,241.64</b>                    | -656,332.90        | -656,243.70                            | -656,312.55       | -656,241.69                         |
| M14678      | 225   | 2673   | 25.51                               | <b>-47,166.74</b>                     | -47,182.26         | -47,167.72                             | -47,174.37        | -47,167.41                          |

Table S2 TreeBASE protein alignments and average log-likelihoods. In bold face are the highest log-likelihood found for each alignment.

| TreeBASE ID | #Taxa | #Sites | % Gaps / ambiguous characters | IQ-TREE with default stopping rule | RAxML              | IQ-TREE restricted to RAxML time | PhyML             | IQ-TREE restricted to PhyML time |
|-------------|-------|--------|-------------------------------|------------------------------------|--------------------|----------------------------------|-------------------|----------------------------------|
| M510        | 57    | 430    | 9.38                          | <b>-8,164.14</b>                   | -8,165.75          | <b>-8,164.14</b>                 | -8,175.26         | -8,164.17                        |
| M1118       | 137   | 348    | 26.31                         | <b>-12,837.91</b>                  | -12,840.76         | -12,838.72                       | -12,845.97        | -12,839.32                       |
| M1726       | 50    | 1000   | 37.18                         | <b>-68,153.56</b>                  | -68,154.33         | -68,153.61                       | -68,167.93        | -68,154.15                       |
| M2358       | 55    | 714    | 20.72                         | <b>-14,670.25</b>                  | -14,670.31         | <b>-14,670.25</b>                | -14,677.96        | <b>-14,670.25</b>                |
| M2593       | 56    | 386    | 2.98                          | <b>-8,945.24</b>                   | -8,948.11          | -8,945.25                        | -8,948.04         | -8,948.29                        |
| M2926       | 105   | 899    | 43.08                         | <b>-85,026.88</b>                  | -85,026.90         | -85,026.90                       | -85,027.77        | -85,026.94                       |
| M3113       | 77    | 9918   | 55.33                         | <b>-361,280.00</b>                 | -361,297.06        | -361,281.64                      | -361,347.19       | -361,294.78                      |
| M3114       | 77    | 11234  | 55.77                         | -434,506.92                        | <b>-434,504.13</b> | -434,519.03                      | -434,614.68       | -434,525.05                      |
| M3807       | 82    | 591    | 41.38                         | <b>-38,706.56</b>                  | -38,709.34         | -38,706.87                       | -38,722.00        | -38,707.97                       |
| M3810       | 55    | 271    | 21.31                         | <b>-11,061.54</b>                  | -11,061.76         | <b>-11,061.54</b>                | -11,061.55        | -11,063.98                       |
| M4249       | 153   | 455    | 45.47                         | <b>-57,701.68</b>                  | -57,704.83         | -57,702.29                       | -57,718.75        | -57,703.21                       |
| M4318       | 78    | 2295   | 3.97                          | <b>-185,004.73</b>                 | <b>-185,004.73</b> | <b>-185,004.73</b>               | -185,058.96       | -185,005.08                      |
| M4325       | 73    | 230    | 1.05                          | <b>-21,106.15</b>                  | <b>-21,106.15</b>  | -21,106.15                       | -21,112.61        | -21,106.55                       |
| M4539       | 59    | 12428  | 19.66                         | <b>-473,611.99</b>                 | -473,622.19        | <b>-473,611.99</b>               | -473,662.13       | -473,622.59                      |
| M4780       | 90    | 583    | 45.96                         | <b>-45,725.34</b>                  | -45,726.37         | -45,725.36                       | -45,742.72        | -45,726.26                       |
| M4860       | 62    | 11544  | 18.61                         | <b>-426,418.62</b>                 | <b>-426,418.62</b> | <b>-426,418.62</b>               | -426,418.65       | <b>-426,418.62</b>               |
| M4884       | 50    | 11827  | 34.80                         | <b>-242,169.69</b>                 | <b>-242,169.69</b> | <b>-242,169.69</b>               | -242,174.90       | -242,173.32                      |
| M5379       | 60    | 7776   | 13.91                         | -279,270.38                        | <b>-279,270.36</b> | -279,270.39                      | -279,299.37       | -279,282.01                      |
| M6416       | 57    | 126    | 7.10                          | <b>-5,181.98</b>                   | -5,182.79          | -5,182.93                        | -5,186.26         | -5,184.03                        |
| M7078       | 77    | 12457  | 13.04                         | <b>-379,457.82</b>                 | -379,463.94        | -379,458.13                      | -379,477.72       | -379,459.36                      |
| M7729       | 62    | 2973   | 29.31                         | <b>-110,353.19</b>                 | -110,361.23        | -110,353.19                      | -110,379.37       | -110,353.20                      |
| M8175       | 194   | 665    | 29.40                         | -26,504.23                         | -26,506.99         | -26,504.27                       | <b>-26,503.94</b> | -26,504.89                       |
| M8461       | 89    | 5699   | 29.89                         | <b>-307,038.70</b>                 | -307,047.10        | -307,040.16                      | -307,126.42       | -307,056.90                      |
| M8569*      | 164   | 383    | 44.67                         | <b>-40,594.84</b>                  | -40,595.64         | -40,595.27                       | -40,595.81        | -40,596.53                       |

| TreeBASE ID | #Taxa | #Sites | % Gaps /<br>ambiguous<br>characters | IQ-TREE with<br>default<br>stopping rule | RAxML              | IQ-TREE<br>restricted to<br>RAxML time | PhyML             | IQ-TREE restricted<br>to PhyML time |
|-------------|-------|--------|-------------------------------------|------------------------------------------|--------------------|----------------------------------------|-------------------|-------------------------------------|
| M8630       | 50    | 21154  | 0.22                                | <b>-588,675.92</b>                       | -588,675.92        | <b>-588,675.92</b>                     | -589,298.44       | -588,831.51                         |
| M9973       | 60    | 327    | 3.42                                | <b>-13,077.17</b>                        | -13,077.98         | -13,077.19                             | -13,077.18        | -13,077.26                          |
| M10236      | 59    | 164    | 62.23                               | <b>-5,113.01</b>                         | -5,113.90          | -5,113.93                              | -5,117.14         | -5,114.20                           |
| M10273      | 169   | 11009  | 17.16                               | <b>-650,541.12</b>                       | <b>-650,541.12</b> | <b>-650,541.12</b>                     | -650,541.14       | <b>-650,541.12</b>                  |
| M10372      | 169   | 22426  | 15.93                               | <b>-1,359,736.89</b>                     | -1,359,736.90      | <b>-1,359,736.89</b>                   | -1,359,796.74     | -1,359,736.90                       |
| M10866      | 88    | 3329   | 3.26                                | -150,463.11                              | <b>-150,463.11</b> | -150,463.11                            | -150,463.12       | -150,463.11                         |
| M11012      | 55    | 11500  | 19.55                               | <b>-495,773.15</b>                       | -495,787.73        | -495,778.73                            | -495,824.51       | -495,778.26                         |
| M11013      | 55    | 8741   | 19.14                               | <b>-251,347.86</b>                       | <b>-251,347.86</b> | <b>-251,347.86</b>                     | -251,347.87       | <b>-251,347.86</b>                  |
| M11335      | 99    | 696    | 27.19                               | <b>-41,474.35</b>                        | -41,475.04         | -41,474.41                             | -41,499.34        | -41,476.80                          |
| M11336      | 95    | 268    | 0.00                                | <b>-14,847.24</b>                        | -14,849.76         | <b>-14,847.24</b>                      | -14,847.24        | -14,853.97                          |
| M11338      | 100   | 567    | 48.18                               | <b>-32,213.69</b>                        | -32,217.12         | -32,215.33                             | -32,251.85        | -32,217.06                          |
| M11341      | 100   | 699    | 26.36                               | <b>-53,103.85</b>                        | -53,105.13         | -53,104.67                             | -53,131.42        | -53,113.88                          |
| M11342      | 91    | 323    | 0.00                                | <b>-24,050.26</b>                        | -24,050.42         | <b>-24,050.26</b>                      | -24,056.54        | <b>-24,050.26</b>                   |
| M11344      | 84    | 691    | 50.36                               | <b>-42,681.83</b>                        | -42,683.91         | -42,681.85                             | -42,687.96        | -42,683.34                          |
| M11595      | 66    | 463    | 12.87                               | <b>-27,727.92</b>                        | -27,727.92         | <b>-27,727.92</b>                      | <b>-27,727.92</b> | <b>-27,727.92</b>                   |
| M11596      | 62    | 439    | 17.46                               | <b>-34,244.66</b>                        | <b>-34,244.66</b>  | <b>-34,244.66</b>                      | -34,244.66        | <b>-34,244.66</b>                   |
| M11740      | 138   | 4427   | 2.62                                | -376,122.31                              | -376,125.26        | <b>-376,121.96</b>                     | -376,125.96       | -376,128.09                         |
| M12103      | 97    | 199    | 0.00                                | <b>-17,447.60</b>                        | -17,448.40         | -17,449.18                             | -17,448.93        | -17,459.79                          |
| M12104      | 93    | 349    | 0.00                                | <b>-16,139.84</b>                        | -16,144.58         | -16,140.05                             | -16,144.77        | -16,145.06                          |
| M12376      | 116   | 327    | 37.23                               | <b>-20,453.87</b>                        | -20,454.54         | -20,453.88                             | -20,455.30        | -20,453.91                          |
| M13804      | 78    | 1889   | 16.89                               | <b>-113,431.86</b>                       | -113,433.54        | <b>-113,431.86</b>                     | -113,439.18       | <b>-113,431.86</b>                  |

\* We removed the sequence *Homo\_sapiens\_GSTA3* from the original multiple sequence alignment because it was obviously unaligned.
